# Supplementary material for: Hypoxia-Induced ROS Promotes Mitochondrial Fission and Cisplatin Chemosensitivity via HIF-1α/Mff Regulation
Source: Preprints.org preprint supplement (doi:10.20944/preprints202011.0204.v1), 2020-11-05
Supplement: Supplementary file 4 [file Supplementary table 2.doc]

Supplementary table 2. Associations between SLC2A1, PDGFB, VEGFA and HIF-1αlevels and clinical parameters in patients with HNSCC (n = 72)

| Group | SLC2A1expression  (ΔCt Mean ± SD) | | P  value | PDGFB expression (ΔCt Mean ± SD) | | P  value | VEGFA expression (ΔCt Mean ± SD) | | | P  value | HIF-1α expression (ΔCt Mean ± SD) | | P  value |  |
| --- | --- | --- | --- | --- | --- | --- | --- | --- | --- | --- | --- | --- | --- | --- |
| **Age(y)**  ≥ 60  < 60  **Gender**  Male  Female  **Smoking history**  Yes  No  **Alcohol history**  Yes  No  **T classification**  T1-T2  T3-T4  **Lymph node status**  pN positive  pN negative  **TNM stage**  I–II  III–IV  **Perineural invasion**  Yes  No  **ECS**  Yes  No  **Prior Radiotherapy**  Yes  No  **Pathological differentiation**  Well  Moderately/Poorly | | 5.826 ± 1.427  5.662 ±1.727   |  | | --- | | 5.652 ± 1.604  5.969 ± 1.443  5.430 ± 1.377  5.892 ± 1.608  5.360 ± 1.397  5.890 ± 1.587  5.763 ± 1.623  5.740 ± 1.304  5.894 ± 1.356  5.555 ± 1.805  5.597 ± 1.908  5.843 ± 1.335  6.035 ± 1.719  5.627 ± 1.463    5.402 ± 1.379  5.8236 ±1.584  5.802 ± 1.879  5.750 ± 1.507 |     4.650 ± 1.531  6.080 ± 1.602 | 0.6616  0.4162  0.2528  0.2114  0.9586  0.3656  0.5244  0.3012  0.3650  0.9237  0.3116 | | 8.111 ± 1.530  7.306 ± 1.310  7.472 ±1.452  8.389 ±1.396  6.994 ± 1.301  8.113 ± 1.448  6.913 ± 1.362  8.077 ± 1.423  7.780 ± 1.526  7.789 ± 1.397  8.008 ± 1.373  7.454 ± 1.610  7.444 ± 1.633  7.966 ± 1.388  7.751 ± 1.584  7.796 ± 1.461  7.843 ± 1.463  7.768 ± 1.507  8.031 ± 2.059  7.741 ± 1.399  7.740 ± 1.416  7.904 ± 1.724 | 0.0241  0.0130  0.0032  0.0034  0.9831  0.1240  0.1601  0.9063  0.8722  0.5721  0.6900 | | 5.451± 1.535  4.966 ± 1.493  5.111 ±1.649  5.525 ± 1.231  4.672 ± 1.546  5.486 ± 1.468  4.580 ± 1.544  5.472 ± 1.467  5.360 ± 1.550  4.861 ± 1.419  5.237 ± 1.412  5.267 ± 1.707  5.372 ± 1.732  5.183 ± 1.420  5.406 ± 1.127  5.175 ± 1.687  4.730 ± 1.050  5.363 ± 1.597  5.709 ± 2.200  5.175 ± 1.399  5.113 ± 1.485  5.656 ± 1.619 | 0.1853  0.2812  0.0388  0.0307  0.2514  0.9362  0.6213  0.5529  0.1775  0.3074  0.1937 | | | 3.332 ±1.774  3.609 ±1.526  3.552 ± 1.595  3.239 ± 1.826  3.322 ± 1.702  3.499 ± 1.670  3.145 ± 1.707  3.548 ± 1.661  3.375 ± 1.754  3.699 ± 1.351  3.410 ± 1.661  3.502 ± 1.709  3.454 ± 1.825  3.444 ± 1.601  3.666 ± 2.057  3.345 ± 1.466  4.050 ± 1.012  3.315 ± 1.761  3.341 ± 2.029  3.465 ± 1.623  3.446 ± 1.599  3.451 ± 1.916 | 0.4913  0.4579  0.6866  0.3789  0.4977  0.8209  0.9810  0.4509  0.1520  0.8295  0.9915 | |

Abbreviations: SD, standard deviation; pN, lymph node-metastasis stage; ECS, extracapsular spread of metastatic lymph nodes.
△Ct indicates the difference in the cycle number at which a sample’s fluorescent signal passes a given threshold above baseline (Ct) derived from a specific gene compared with that of β-actin in tumor tissues.
