# Supplementary material for: Hypoxia-Induced ROS Promotes Mitochondrial Fission and Cisplatin Chemosensitivity via HIF-1α/Mff Regulation
Source: Preprints.org preprint supplement (doi:10.20944/preprints202011.0204.v1), 2020-11-05
Supplement: Supplementary file 6 [file Supplementary table1.doc]

Supplementary table 1. The primer sequences of RT-PCR.

| Primers | Forward | Reverse | |  |
| --- | --- | --- | --- | --- |
| Drp1  Fis1  Mff  Mid49  Mid51  GDAP1  Mfn1  Mfn2  OPA1  PDGFB  VEGFA  SLC2A1  HIF-1α  β-actin | CCAAGGTGCCTGTAGGTGAT  GTCCAAGAGCACGCAGTTTG  ACTGAAGGCATTAGTCAGCGA  CACGGCCATTGACTTTGTGC  ATGGCAGAGTTCTCCCAGAAA  ATGCGTTTGAACTCAACTGGA  ATGACCTGGTGTTAGTAGACAGT  CTCTCGATGCAACTCTATCGTC  TGTGAGGTCTGCCAGTCTTTA  CTCGATCCGCTCCTTTGATGA  AGGGCAGAATCATCACGAAGT  TCTGGCATCAACGCTGTCTTC  GAACGTCGAAAAGAAAAGTCTCG  CCTGGCACCCAGCACAAT | CAGCAGTGACAGCGAGGATA  ATGCCTTTACGGATGTCATCATT  TCCTGCTACAACAATCCTCTCC  TCGTACATCCGCTTAACTGCC  CCCTGTCAATGAACCGCTT  TCAGGCATTAACCTGGGTGTT  AGACATCAGCATCTAGGCAAAAC  TCCTGTACGTGTCTTCAAGGAA  TGTCCTTAATTGGGGTCGTTG  CGTTGGTGCGGTCTATGAG  AGGGTCTCGATTGGATGGCA  CGATACCGGAGCCAATGGT  CCTTATCAAGATGCGAACTCACA  GGGCCGGACTCGTCATACT |  | |
